# Supplementary material
Source: Springer Nature journal article supplement (https://www.springermedizin.de/resource/supplementary/12874_2005_147_MOESM2_ESM.pdf/9433866)
Supplement: MOESM2 [file 9433866]

**Cochrane Database of Systematic Reviews (CDSR) searched via The Cochrane Library at <http://www.nelh.nhs.uk/cochrane.asp>**

**Issue 1 2005**

**Searched: 31/03/05**

- #1 Any MeSH descriptor with qualifier: AE
- #2 Any MeSH descriptor with qualifier: DE
- #3 Any MeSH descriptor with qualifier: CO
- #4 Any MeSH descriptor with qualifier: PO
- #5 Any MeSH descriptor with qualifier: TO
- #6 Any MeSH descriptor with qualifier: CI
- #7 MeSH descriptor Drug Hypersensitivity explode all trees
- #8 MeSH descriptor Drug Toxicity explode all trees
- #9 MeSH descriptor Product Surveillance, Postmarketing explode all trees
- #10 (safe or safety or adverse or tolerability or toxicity or toxic or adrs or adr or tolerance or tolerate or harm or harms or harmful or complication\* or risk or risks) near/20 objective\* in Abstract
- #11 (side next effect\*) near/20 objective\* in Abstract
- #12 (undesirable next effect\*) near/20 objective\* in Abstract
- #13 (treatment next emergent) near/20 objective\* in Abstract
- #14 (safe or safety or adverse or tolerability or toxicity or toxic or adrs or adr or tolerance or tolerate or harm or harms or harmful or complication\* or risk or risks) in Record Title
- #15 (side next effect\*) in Record Title
- #16 (undesirable next effect\*) in Record Title
- #17 (treatment next emergent) in Record Title
- #18 #1 or #2 or #3 or #4 or #5 or #6 or #7 or #8 or #9 or #10 or #11 or #12 or #13 or #14 or #15 or #16 or #17

**Key**

**Sets #1 to #6** are ‘floating’ subheadings

**next** – words must be adjacent to each other

**near/20** – words must be within 20 words of each other in either direction
